# Supplementary material for: Phylogeography and Antioxidant Activity of Proso Millet (Panicum miliaceum L.)
Source: MDPI journal article supplement (doi:10.3390/plants10102112), 2021-10-05
Supplement: s1 [file s1]

Supplementary Materials:

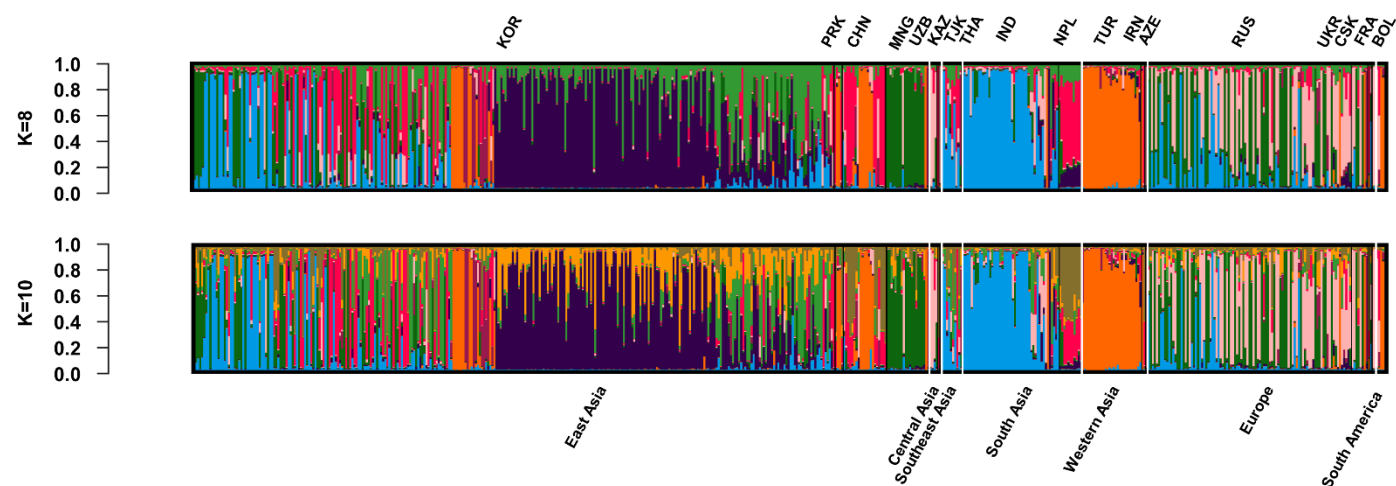

Figure S1. Population structure diagrams when the numbers of subpopulations (K) were 8 and 10.

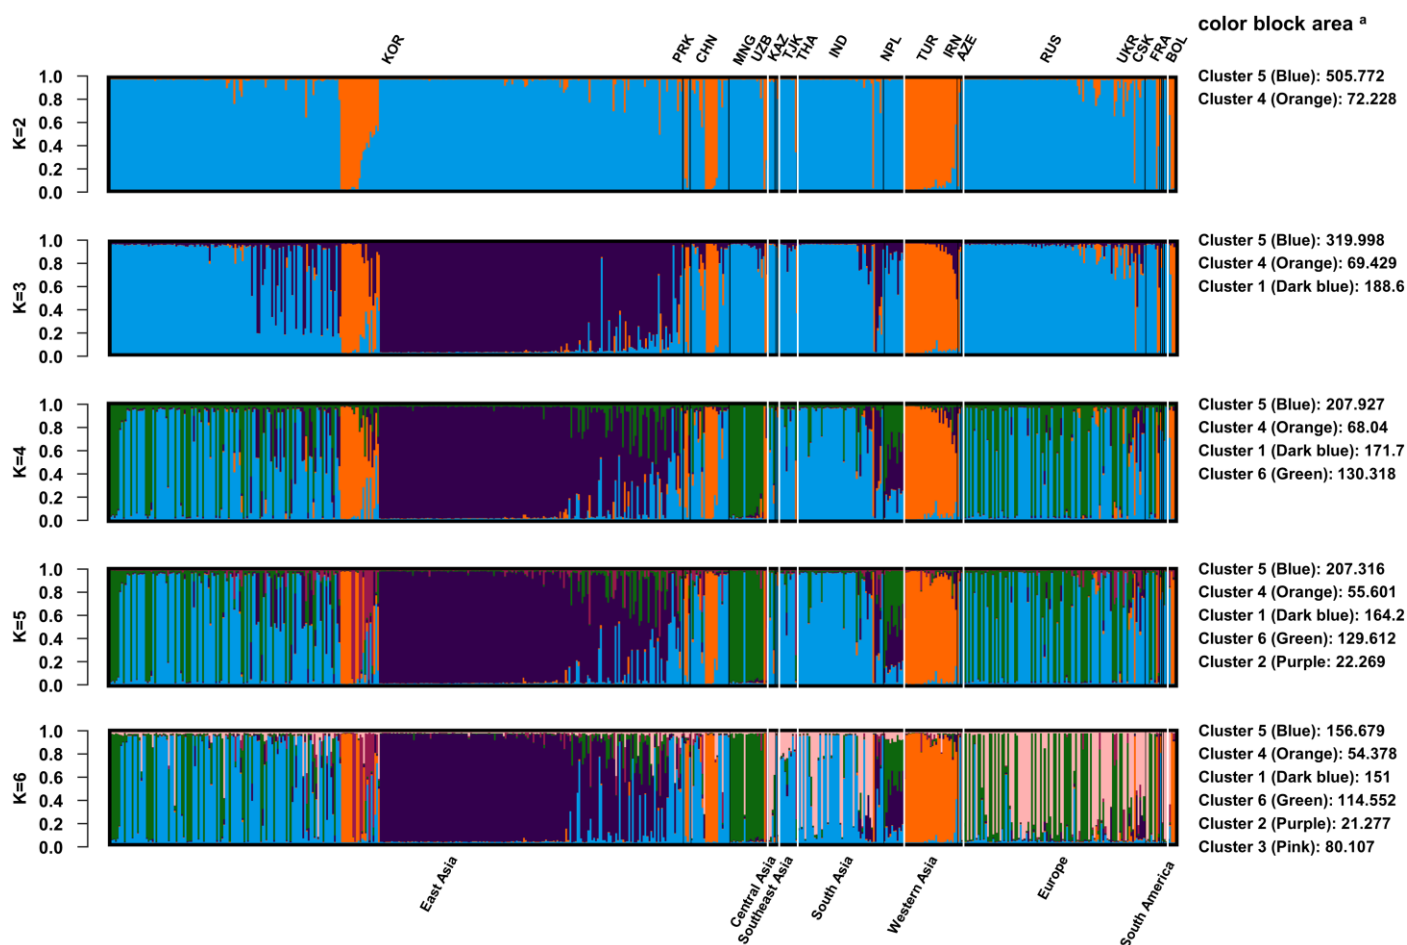

Figure S2. Trends in population structure as K increased from 2 to 6. <sup>a</sup> Colored area indicates proportions based on a total of 578 accessions.

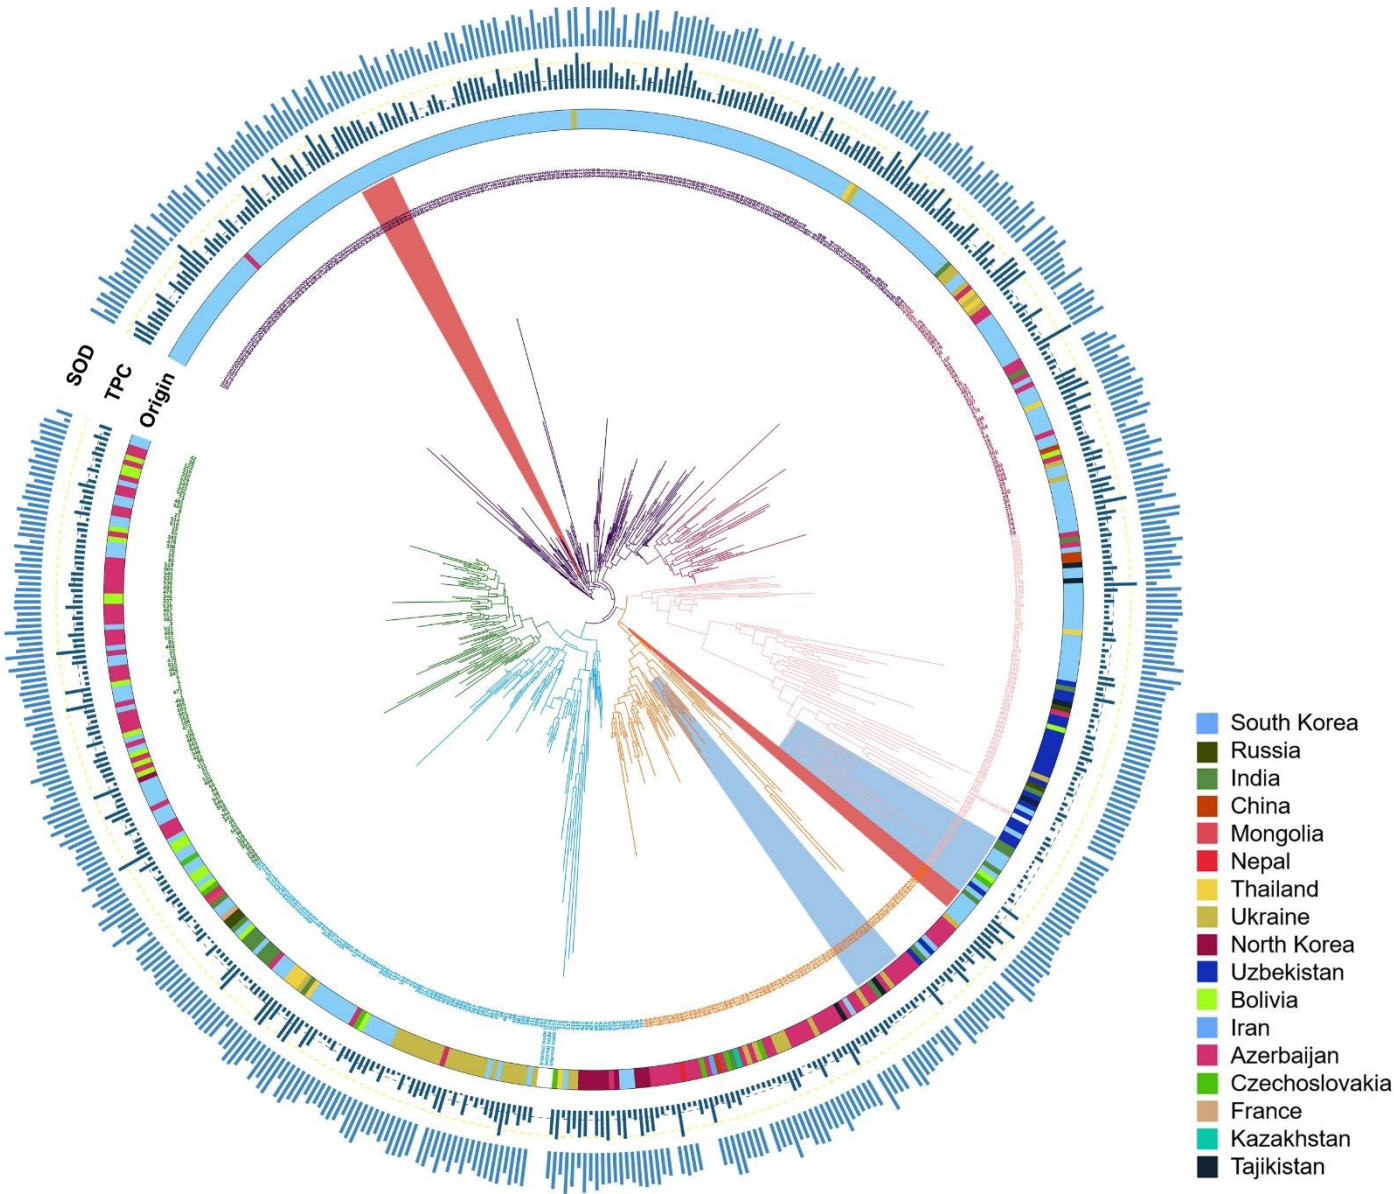

**Figure S3.** Phylogenetic analysis using 37 SSR markers and the neighbor-joining method. We compared the phenotypes of 578 individuals in six genotype clusters. Three groups of phenotypes were arranged in the outer circle of the phylogenetic tree in the form of a simple bar.

**Table S1.** Genetic diversity of each cluster and region.

| Cluster 1 |           | Cluster 2 |           | Cluster 3 |           | Cluster 4 |           | Cluster 5 |           | Cluster 6 |           |
|-----------|-----------|-----------|-----------|-----------|-----------|-----------|-----------|-----------|-----------|-----------|-----------|
| Origin    | Diversity |
| KOR       | 0.138092  | KOR       | 0.086145  | KOR       | 0.143174  | KOR       | 0.154474  | KOR       | 0.223160  | KOR       | 0.094595  |
| IND       | 0.103448  | CHN       | 0.162162  | CHN       | 0.143174  | PRK       | 0.148649  | PRK       | 0.013514  | MNG       | 0.092444  |
|           |           | THA       | 0.024024  | IND       | 0.143174  | CHN       | 0.205185  | CHN       | 0.320863  | RUS       | 0.093454  |
|           |           | IND       | 0.037507  | TUR       | 0.143174  | UZB       | 0.040541  | MNG       | 0.222973  | UKR       | 0.040541  |
|           |           | RUS       | 0.118118  | RUS       | 0.143174  | TUR       | 0.274163  | THA       | 0.131351  |           |           |
|           |           |           |           | UKR       | 0.143174  | RUS       | 0.156156  | IND       | 0.079478  |           |           |
|           |           |           |           |           |           |           |           | NPL       | 0.037162  |           |           |

|  |  |  |  |     |          |
|--|--|--|--|-----|----------|
|  |  |  |  | RUS | 0.092905 |
|  |  |  |  | UKR | 0.199324 |

**Table S2.** Genetic diversity and combinations of six clusters.

| Cluster | Gene diversity | Non polymorphic locus                                                                                                                                                                                                                                                                                                                           | Non polymorphic locus number |
|---------|----------------|-------------------------------------------------------------------------------------------------------------------------------------------------------------------------------------------------------------------------------------------------------------------------------------------------------------------------------------------------|------------------------------|
| 1       | 0.1396         | SSR-67 (220/220), SSR-70 (132/132), SSR-82 (335/335), SSR-120 (224/224), SSR-121 (183/183), SSR-142 (124/124), SSR-143 (144/144), SSR-146 (177/177)                                                                                                                                                                                             | 8                            |
| 2       | 0.0992         | SSR-71 (191/191), SSR-121 (183/183), SSR-131 (349/349), SSR-143 (144/144), SSR-420 (214/214), SSR-448 (259/259), SSR-458 (208/208), SSR-460 (270/270)                                                                                                                                                                                           | 8                            |
| 3       | 0.1432         | SSR-100 (236/236), SSR-128 (263/263), SSR-131 (349/349), SSR-142 (124/124), SSR-146 (177/177), SSR-404 (302/302), SSR-420 (214/214), SSR-448 (259/259), SSR-460 (270/270)                                                                                                                                                                       | 9                            |
| 4       | 0.2484         | SSR-460(270/270)                                                                                                                                                                                                                                                                                                                                | 1                            |
| 5       | 0.1746         | -                                                                                                                                                                                                                                                                                                                                               | -                            |
| 6       | 0.0992         | SSR-31 (287/287), SSR-67 (220/220), SSR-70 (132/132), SSR-82 (335/335), SSR-85 (363/363), SSR-109 (222/222), SSR-120 (224/224), SSR-128 (263/263), SSR-129 (239/239), SSR-131 (349/349), SSR-142 (124/124), SSR-143 (144/144), SSR-404 (302/302), SSR-420 (214/214), SSR-430 (194/194), SSR-448 (259/259), SSR-458 (208/208), SSR-460 (270/270) | 18                           |
